# Supplementary material for: When moult overlaps migration: moult-related changes in plasma biochemistry of migrating common snipe
Source: PeerJ. 2017 Mar 7;5:e3057. doi: 10.7717/peerj.3057 (PMC5344014; doi:10.7717/peerj.3057)
Supplement: Supplemental Information 1 [file peerj-05-3057-s001.xlsx]

## Sheet: Arkusz1
Year	Standardized date	Hour	Sex	Total protein (g/l)	Triglicerydes (mg/dl)	Glucose (mg/dl)	Albumin (g/l)	Uric acid (mg/dl)	Moult stage (1 - before moult, 2 - initial stage, 3 - advanced stage)
2009	-0.120115	6	M	34	106	396	11.1		2
2013	1.39002	6	M	23	39	391			1
2015	-1.22167	6	M	26					1
2015	0.767714	20	M	32	50	372	22.7		1
2013	1.12906	6	M	30	62	335	13	3.82	1
2012	-1.6738	24	M	34	45	512	22.6		2
2015	0.614684	23	M	31					3
2013	-0.523633	11	M	42	99	349	17.9	11.93	1
2015	0.155595	21	M	45	75	451	27.2		1
2015	0.920744	20	M	23	118	525	22.9	7.55	1
2015	0.00256475	22	M	45	79	424	41.4	6.8	3
2015	-1.22167	6	M	38	74				1
2012	0.773906	22	M	46	71	631	29.2		2
2015	-1.22167	6	M	38	78	501	19.5		1
2013	1.65097	21	M	31	29	383		5.17	2
2012	0.773906	6	M	35	40	380	16		2
2009	0.586389	5	M	31	67				1
2013	1.99891	6	M	31	71	422	15.7	11.87	1
2015	-0.915614	8	M	44	89	461	27		2
2013	-1.13252	6	M	30	110	478	27.5		1
2015	1.07377	23	M	28	55	570	24.2		1
2012	0.197976	9	M	37	56	410			1
2013	1.99891	17	M	43	166	458	16.2	5.87	2
2011	1.20616	6	M	32	96				3
2012	1.06187	21	M	45	100	336	24.6		1
2013	1.477	6	M	34	71	479	15.3	3.78	1
2013	-0.00172816	6	M	27					1
2015	-1.52773	20	M	26	43				1
2009	-0.120115	6	M	40	74	487	12.1		1
2009	0.586389	5	M	36	57				1
2009	0.429388	6	M	33					1
2009	0.978891	10	M	41	52		9.5		1
2009	0.507888	15	M	37					1
2009	-0.0416147	22	M	37	49				1
2009	0.664889	10	M	31	98				2
2009	0.115386	18	M	40	75		23.1		2
2009	0.115386	18	M	42	24				2
2009	0.507888	19	M	40					2
2009	-0.198616	6	M	41	135		16.1		3
2010	-0.691884	6	M	32	78		14.5		1
2011	0.517225	6	M	39	55		8.5		1
2011	-0.959066	6	M	45					1
2011	0.320387	15	M	39	73				1
2011	1.69826	6	M	36	128		17		2
2011	0.320387	6	M	36	38		12.1		2
2011	-0.663807	6	M	38	83		12.4		2
2011	-0.959066	6	M	42					2
2011	-0.663807	6	M	37					3
2012	1.20585	6	M	44	129	696	18.6		1
2012	0.629923	6	M	35	61				1
2012	0.773906	6	M	41					1
2012	-0.377954	9	M	41					2
2013	1.56398	23	M	28	37	287	13.7	13.23	1
2013	0.433192	10	M	30	107	309	14.6	5.6	1
2013	0.259224	6	M	31	77	363	21.5		1
2013	-1.21951	6	M	25	66	368	23.8	8.72	1
2013	-1.13252	20	M	30	41	398	25.9	13.06	1
2013	0.955097	6	M	42	60	420	21	10.17	2
2013	-0.436648	19	M	28	129	430	27.3	5.88	2
2013	1.39002	10	M	26	52	444			1
2013	1.56398	23	M	41	45	457	28.5	7.72	1
2013	-1.04554	20	M	39	61	469	24.8	16.62	1
2013	0.433192	6	M	35	43	482	19	7.24	1
2013	-1.21951	22	M	49	62	483	24.8	11.39	2
2013	-0.0887122	17	M	32	66	505	13		2
2015	1.53286	6	M	19	56	393	15.7		3
2015	1.2268	22	M	29	91	404	21.7		1
2015	-1.68076	6	M	19	38	501			1
2015	-1.68076	22	M	31	61	563			2
2015	-0.609555	6	M	25	53	598	13.2		2
2015	-1.52773	20	M	25	31	616	18.4		1
2015	0.461654	20	M	46	59	665	17.1	9.69	2
2015	-0.303495	6	M	27	130	674	20.5	12.07	1
2015	1.2268	22	M	23	56	686			1
2015	1.2268	22	M	31	72	755			3
2015	0.920744	6	M	28	54				1
2015	1.2268	14	M	27					2
2013	0.17224	6	M	23	54	331	15	5.04	2
2015	-1.68076	22	M	34	128	432	28.5		1
2009	0.350888	12	F	21					1
2009	0.115386	6	M	31	84	543	13		3
2013	-1.13252	6	M	32	46	353	21.7	9.93	2
2013	-1.13252	22	M	40	63	646	25.5	7.17	1
2015	1.2268	6	M	29	70	459	19.1		1
2009	0.586389	10	M	35	68				1
2009	0.586389	10	M	30					1
2009	0.350888	17	M	48					2
2011	-0.959066	6	M	40					3
2013	0.17224	9	M	36	169	503	15.1		1
2015	-1.68076	6	M	27	95	663		10.98	2
2012	-0.377954	9	M	44					2
2015	-1.22167	6	M	22	64	455			1
2009	-0.669618	23	M	46	38		6.4		2
2010	0.236947	6	M	34	96		12.9		2
2010	0.502327	17	M	36	156				2
2011	0.517225	6	M	35					1
2011	-0.762227	6	M	42					3
2012	1.6378	6	M	35	83	622	18.2		1
2012	-0.665919	5	M	37	98				1
2013	-1.13252	6	M	23	52	283	12.6	10.77	1
2013	0.520176	9	M	40	76	350	23	6.64	1
2013	1.56398	6	M	26	53				1
2015	0.00256475	22	M	38	64	472			1
2015	0.920744	22	M	28	79	499			1
2015	-0.915614	8	M	21	42	518	11.9		1
2013	-0.523633	11	F	33	57	383	7.7		1
2009	-0.748119	6	M	34	74	581	13		2
2009	-3.10313	11	M	32					1
2012	-0.521936	5	M	43	96				1
2013	0.60716	6	M	35	50	390	14.7	10.42	1
2013	0.520176	6	M	37	51	698	24.9	8.28	2
2015	-0.915614	8	M	29					1
2009	-3.10313	11	M	38					2
2011	1.30458	6	M	37	102				1
2011	2.19036	6	M	29	76				3
2011	1.59984	23	M	40	46		15.9		3
2012	-1.09787	6	M	37	142	426	14.7		2
2013	-0.523633	6	M	35	113	290	23.4	7.68	1
2013	0.520176	21	M	32	66	326	18.2		1
2013	0.259224	6	M	27	62	428	14.2		1
2015	0.308624	17	M	38	123	307	21.9		1
2015	1.2268	18	M	20	91	482	19.1		1
2009	0.507888	19	F		86				1
2015	0.461654	12	F	40	113	357	28.8		1
2012	1.06187	21	M	34	123	418	15.4		1
2015	0.614684	23	M	27	77	433	19.7		1
2015	0.00256475	22	M	39	118	473	25.2		1
2015	0.461654	20	M	29	52	496	17.9		2
2015	0.461654	20	M	33	81	541	22.7		1
2015	-1.68076	22	M	28	47	570			2
2015	-0.150465	22	M	25	49	707		6.44	3
2009	0.664889	10	M	34	92				1
2009	0.664889	10	M	34	61				2
2011	-0.663807	6	M	33	73		16.3		2
2012	0.773906	6	M	36	93	519	11.9		1
2013	1.56398	23	M	34	76	488	25.6		1
2013	-1.21951	6	M	30	119				2
2015	0.155595	6	M	36	62	566	22.3		1
2009	-0.120115	6	F	31	49	507	18.1		1
2009	-1.37612	20	M	32	53	324	9.6		2
2009	0.429388	6	M	39					1
2009	-2.86763	22	M	36					2
2010	3.15613	6	M		151				2
2012	-0.809901	5	M	37	59	423			1
2012	-1.09787	6	M	30	66	451	24.8		2
2012	-1.6738	24	M	38	44	572	18.8		2
2013	-0.523633	11	M	26	56	336	20.2		1
2013	0.17224	6	M	29	39	408	8.1	6.9	2
2013	-0.0887122	6	M	26	121				1
2015	1.2268	6	M	27	87	488	20.6		1
2015	0.614684	23	M	31	60	488			1
2015	1.37983	6	M		147				2
2009	0.115386	6	F	35					2
2013	1.477	22	F	47	99	423	22.9	3.8	1
2015	-0.150465	24	F	37	68	831	34.8	8.03	3
2011	-0.565388	6	M	38					2
2012	1.49382	6	M	42	97	558	20.7		3
2012	-0.809901	12	M	40	135	723			1
2012	0.629923	10	M	32	55				2
2013	1.39002	21	M	24	63	309	13		2
2013	-0.349664	5	M	29	91	355	19.1	5.16	1
2013	0.346208	6	M	25	58	471	20.4	4.51	1
2015	0.614684	19	M	33	91	420	21.9		3
2015	0.461654	6	M	33	66	464	19.4	8.57	3
2015	1.2268	6	M	20	102	633	19.1		2
2012	0.629923	6	F	42	49	538			3
2013	-1.13252	22	F	28	59	547	20.3	11.08	1
2009	0.664889	10	M	35	41		21.1		1
2011	-0.959066	6	M	42					3
2012	-1.09787	19	M		94				1
2013	0.520176	21	M	40	95	326	17.9	5.78	1
2013	1.477	22	M	28	82	394	26.6	3.36	1
2013	-0.175696	21	M	30	62	496			1
2013	0.868112	6	M		146				1
2015	-1.68076	6	M	27	59	476	22.1	6.43	2
2015	-1.68076	6	M	33	65	519	8.7		1
2009	0.193887	6	F	57					1
2015	-0.150465	22	F	32	89	601			2
2009	0.272387	17	M	40	16	55	11.8		1
2009	0.115386	6	M	42					2
2013	-0.0887122	14	M	26	155	285			2
2013	-0.0887122	14	M	27	92	393	10.9		1
2013	-0.0887122	21	M	22					1
2015	1.37983	6	M		125				3
2015	0.920744	6	F	31	67	456	15.8		1
2009	0.429388	6	M	26					2
2012	0.629923	6	M	40	67	610			1
2013	-1.13252	20	M	37	58	372	36.7	10.3	2
2013	-0.697601	19	M	29	77	401	20.9	8.15	1
2013	1.477	23	M	32	74	454			1
2013	-0.523633	11	M	28	114	459	23.4	10.67	1
2013	-0.610617	21	M	30	62	500	20.4	7.65	1
2013	1.56398	11	M	31	75	527	25.4	11.35	1
2013	-0.00172816	18	M	15					1
2015	0.461654	6	M	49	91	391	20.9		1
2015	-0.303495	23	M	31	71	581	27.8	8.2	1
2015	0.00256475	22	F	47	143	364			2
2015	0.461654	6	F	31	125	445	25.8		2
2015	-1.68076	22	F	28	68	530	25		1
2009	0.586389	5	M	33					1
2009	-0.120115	23	M						1
2009	0.507888	19	M	36	27				2
2009	0.900391	22	M		80				2
2009	-0.0416147	22	M	37					2
2011	-0.663807	6	M	44	47				1
2012	-1.24185	6	M	35	94	542	21.8		1
2013	0.955097	13	M	27	103	426	26.3		2
2013	0.433192	6	M	32	48	448			1
2013	1.477	19	M	40	63	463	15.5	12.89	1
2015	0.461654	6	M	39	40	342			2
2015	0.767714	6	M	29	70	438	22.9		2
2015	0.461654	20	M	38	144	614	18.1		1
2015	1.07377	21	M	35	82	691			3
2015	-1.22167	6	M	27					1
2011	-0.368549	6	F	33	41				3
2013	1.91192	21	F	37	122	378	26.5	5.07	1
2011	0.517225	14	M	33	92		13.6		3
2012	-0.377954	5	M	45					2
2013	-1.30649	20	M	27	36	314	20.9	11.91	2
2013	-1.30649	24	M	30	41	458	23.4	12.23	3
2013	-0.610617	21	M	24	61	507	16.6	11.18	1
2011	1.99352	6	F	36	76				2
2012	1.49382	6	F	45	85	422	13.3		2
2012	0.629923	6	F	31	39	519			2
2012	-0.953884	9	F	39	92				2
2015	0.767714	18	F	32	74	426	29.9		1
2015	1.07377	23	F	27	63	549	26.6		1
2015	-1.06864	22	F	28	54	575	15.2		2
2009	0.429388	6	M	44					1
2009	0.900391	17	M	38	90		15.3		2
2013	0.520176	17	M	26	152	322	5.5		1
2013	0.259224	6	M	25	71	330	13.6		3
2013	0.694144	10	M	20	103	379	12.6		1
2013	-0.00172816	6	M	28	72	433	14.6		2
2013	-0.697601	19	M	21	85	442	16.2	16.77	3
2015	-0.303495	22	M	34	66	413	24.5		1
2009	0.74339	10	F	26	11				2
2013	0.520176	6	F	24	53	302			2
2013	-1.04554	24	F	26	67	402	17.2		1
2013	-1.21951	22	F	34	43	703	24.1	7.22	2
2015	0.920744	6	F	32	72	399			1
2015	-0.150465	24	F	25	62	554	25	10.12	3
2012	-0.953884	5	M	40	138	355			1
2012	0.629923	14	M	40	96	416	15.4		1
2012	0.629923	14	M	35	108	440	19.5		2
2012	0.197976	9	M	37	80	484	21.2		1
2013	-1.21951	22	M	34	38	422	20.3	10.36	3
2013	-0.26268	6	M	25	80	464	23.8	8.56	1
2013	0.259224	6	M	30	60	555	15.4		1
2015	0.614684	19	M	37	106	434	8.5		1
2015	-0.303495	22	M	31	48	478	31	14.47	2
2015	-0.915614	20	M	31	90	495			2
2015	0.00256475	24	M	40	109	532	24.1	8.89	1
2015	0.155595	6	M	35	97	536			1
2015	-0.303495	23	M	29	67	607	26.1	6.99	3
2015	0.461654	20	M	36	52	630	14.2		1
2015	-0.456525	8	M	16					1
2011	-0.959066	6	F	40					2
2013	-1.21951	22	F	21	52				2
2015	-0.456525	24	F	30	60	458			1
2015	-1.68076	6	F	46	131	509	16.3		2
2015	0.155595	12	F	31	71	540	29.9		1
2009	0.586389	10	M	35	105				1
2009	0.664889	10	M	35	20				2
2012	1.06187	6	M	43	93	420	20.7		2
2012	0.773906	22	M	40	78	529			1
2012	-0.377954	9	M	42					1
2013	0.346208	6	M	36	37	288	18.7	5.35	1
2013	-0.26268	6	M	29	92	365	22.8	13.3	1
2013	-1.13252	20	M	36	67	511	21.6	14.61	2
2015	-1.52773	6	M	35	83	420	14.3	6.97	2
2015	-1.68076	6	M	17	76	561			1
2009	0.115386	6	F	49	75		7.8		1
2009	0.978891	6	F	36					2
2009	0.82189	11	F	31					3
2011	-0.959066	6	F	48					1
2012	1.20585	6	F	44	109	546	24.6		1
2013	-0.523633	11	F	33	81	401	16.6	7.4	1
2013	-0.610617	21	F	32	112	646	28	8.27	3
2015	-1.52773	6	F	31	101	400	29.2	14	2
2015	0.155595	21	F	46	91	571	31	18.73	2
2012	-1.6738	15	M	34	138	383	16.7		1
2012	-0.521936	21	M	46	107				1
2015	0.155595	21	M	41	85	380	35.2	10.5	1
2015	0.767714	12	M	35	134	417	24.2		1
2015	-0.762584	6	M	23	50	439	14.4		1
2015	-0.915614	20	M	26	57	560	10.9		1
2015	1.07377	23	M	23	108	567	23		1
2009	0.429388	14	F	44					2
2010	0.236947	6	F	39	195				2
2015	-0.762584	20	F	30	48	550	21.8		1
2009	0.507888	23	M	38					2
2011	0.320387	15	M	40	114				3
2012	0.197976	9	M	49	132	450	25		1
2013	0.781128	6	M	43	65	328	12.9	10.34	1
2013	-1.30649	20	F	29	86	632	11.9	12.35	2
2015	-0.915614	8	F	26	64	466	10.8		1
2013	1.91192	6	M	35	82	424	20	5.2	1
2013	-1.21951	6	M	31					3
2015	1.53286	6	M	28	128	390	22.3		1
2009	-1.37612	24	F	42	117	533	13.6		2
2009	0.193887	6	F	36	8		7.6		1
2011	-0.565388	6	F	36					1
2011	-0.565388	6	F	38					1
2011	-0.663807	6	F	39	87				2
2013	-1.13252	20	F	39	85	530	25.5	9.25	1
2015	-1.3747	6	F	44	64	460	10.3		2
2015	-1.68076	6	F	21	57	617		9.5	2
2013	-0.523633	21	M	30	61	554	23.4	10.55	1
2015	-0.609555	6	M	28	86	457	17.4		2
2010	0.236947	6	F	35	164				1
2010	-0.691884	6	F	47					2
2012	1.49382	6	F	32	95	536			2
2013	-1.30649	18	M	27	73	451	21.6	10.05	1
2013	-0.697601	19	M	24	81				1
2009	0.664889	10	F	39	102		16.5		2
2013	-0.523633	6	F	41	78	345	14.9	8.23	2
2013	0.259224	6	F	31	47	464	13.9		1
2013	-0.610617	21	F	47	90	558	20.8	4.87	1
2009	0.586389	10	M	32	36		5.8		1
2011	2.09194	11	M	40	97		20.3		1
2012	-1.52981	22	M	38	117	474			3
2012	1.34984	23	F	43	71	515	25.2		2
2013	0.955097	6	F	42	57	427	22	4.47	2
2013	-1.21951	22	F	37	85	505	32.4		1
2013	-1.30649	24	F	31	70	566	24.5		1
2015	0.155595	21	F	51	116	348	20.3		1
2015	-1.68076	6	M	31	53	579	26.7	5.21	2
2009	-0.669618	23	F	22	33	215	7		3
2009	0.978891	10	F	42	50				1
2011	-0.959066	6	F	48					2
2013	-1.30649	18	F	23	40	125	15	5.51	1
2013	0.520176	6	F	35	110	510	21.7		1
2015	0.614684	23	F	32	78	348			1
2015	0.767714	20	F	34	92	377	27.6		2
2015	0.767714	20	F	35	54	384	24.5		1
2015	-0.915614	8	F	22	54				1
2015	0.767714	14	F	29					1
2009	-2.78913	16	M	56	118	397	25.1		2
2009	-0.748119	6	M	40					1
2011	-0.565388	6	M	38	74		31.2		1
2013	-0.523633	13	M	28	76	398	18.1	12.31	1
2010	-0.161124	9	F	34	163		15.1		1
2011	1.99352	6	F	35	69		19.8		3
2012	1.49382	23	F	40	73	593	19.9		3
2013	-0.697601	19	F	31	87	577	22.4	7.4	2
2015	0.461654	14	F	31	122	511	17		1
2009	0.507888	19	M	42	22	150	3.7		1
2009	-1.61162	6	M	33	122	555	3.1		1
2010	-0.293814	6	M	36					1
2012	0.629923	10	M	50	123	441			2
2015	1.2268	10	M	26	48				1
2009	-0.198616	6	F	31	192	377	10.1		2
2009	-1.61162	8	F	40	187	634	15.2		2
2010	-0.691884	6	F	39	123				2
2011	-0.762227	6	F	39					2
2012	-1.38583	6	F	38	135	487	18.6		1
2012	1.20585	6	F	39	51	845	24.8		2
2013	-1.04554	6	F	29	146	440			2
2013	-1.21951	22	F	26	44	463	17.8	13.45	1
2013	1.12906	6	F	29	78	520	21.3	6.91	1
2013	-1.30649	20	F	27	33	527	16.6	16.09	2
2013	-1.30649	24	F	28	83	556	23.3	9.17	2
2015	1.53286	6	F	34	83	367	23		1
2015	0.920744	10	F	36	71	372	17.2		1
2015	0.767714	6	F	25	92	434	19.5		1
2015	0.461654	20	F	39	65	584	13		3
2009	-0.355617	6	M	27					3
2015	-1.3747	22	M	46	58	394	6.7		2
2015	0.614684	23	M	33	85	433	7.4		1
2015	0.461654	20	M	40	88	476	19.1		1
2015	1.2268	10	M	24	72	503			1
2015	0.155595	6	M	31	74	549	24.3		1
2015	1.2268	22	M	28					1
2015	-0.762584	6	M	26	69				2
2010	-0.691884	6	F	35					1
2011	0.517225	14	F	40	45				3
2012	-0.377954	5	F	38					1
2013	0.433192	6	F	38	58	41		9.53	1
2013	-1.04554	24	F	34	78	442	18.5	10.44	3
2013	-0.00172816	6	F	28	89	521	18.3		2
2015	0.767714	6	F	28	59	378	4.5	6.06	1
2015	-1.68076	22	F	37	66	383	25.8		2
2015	0.00256475	22	F	54	80	403	38.2	6.13	1
2015	0.767714	18	F	31	46	617	27.1		1
2009	-0.198616	6	M	41	194		16.1		2
2012	-1.52981	13	M	35	132	422	21.4		1
2013	0.520176	17	M	24	117	347	7.8		1
2013	0.781128	14	M	31	79	469	11.7	11.22	3
2009	0.82189	11	F	39	6				2
2011	-0.959066	6	F	35					2
2012	1.06187	21	F	37	119	459	17		1
2012	-1.38583	24	F	35	135	517			2
2012	-0.953884	5	F	44	132				1
2013	-1.21951	22	F	27	49	574	20.8	12.61	3
2015	-0.303495	23	F	30	60	358	27.3	6.96	3
2015	0.614684	11	F	48	143	418	21.8		1
2015	-0.303495	8	F	29	90	493	19.7		3
2015	0.155595	6	M	44	119	386	23.4	6.29	2
2015	1.2268	10	M	25					2
2011	-0.663807	6	F	40					2
2012	1.6378	6	F	33	93	475	14		1
2012	-0.377954	9	F	36					2
2013	-1.30649	20	F	29	69	370	17.4		2
2013	-0.436648	21	F	35	104	445	20.6	6.69	3
2013	-0.523633	6	F	32	107	463	21.8	6.91	1
2013	-0.436648	19	F	32	154	507	19		1
2013	-0.349664	5	F	27	123	580	22.5	8.81	3
2015	-0.303495	23	F	28	69	452	17.9	5.82	3
2015	0.461654	6	F	40	73				2
2015	0.461654	12	F	41	123				2
2012	1.06187	6	M	36	62	482	24		1
2012	0.629923	6	M	38	46	721			1
2012	-0.665919	9	M	32	76				2
2013	-0.26268	8	M	42	91	393	14.1		1
2013	-0.175696	21	M	33	137	614			1
2015	1.07377	21	M	35	61	567	29.5		1
2009	0.350888	9	F	41					1
2009	0.586389	10	F	34	42		8.9		2
2009	0.586389	10	F	33					2
2012	-1.52981	22	F	38	86	502			3
2012	0.197976	9	F	33	96	538	24.1		2
2012	-1.52981	18	F	40	125	708	24.2		1
2013	-0.26268	6	F	24	92	332	22.5	8.73	2
2015	0.155595	12	F	35	107	380	34.6	10.67	1
2015	0.155595	21	F	47	98	468	28.2		1
2015	0.155595	21	F	41	87	488	32.8		1
2012	-0.809901	12	M	41	82				1
2015	-1.68076	22	M	29	61	503		11.91	1
2012	0.917888	6	F	34	76	716	21.7		2
2013	0.955097	6	F	43	67	366	13.4	3.4	1
2015	0.461654	20	F	42	62	566	14.3		2
2015	-0.303495	23	F	28	63				1
2015	1.53286	6	M	25	82	360	11.4		1
2015	-0.915614	22	M	19	36	495	11		1
2009	0.507888	19	F	39					2
2011	-0.762227	6	F	38					1
2012	-1.38583	22	F	34	64	637	24.9		2
2013	1.39002	21	F	32	60	363			1
2013	0.346208	21	F	28	66	516	23.6		1
2013	0.259224	6	F	38	53	608	20.7		1
2015	-1.06864	22	F	35	40	493	14.7		2
2015	-1.52773	6	F	27	114	590	18.5	8.57	1
2013	0.0852559	7	M	34	43	386	14.5	12.34	1
2015	-1.68076	22	M	32	64	422	24.7	12.76	2
2015	-1.68076	22	F	28	107	455			1
2015	-1.52773	6	F	29	132	499	23.7	16.74	2
2015	-1.68076	6	F	24	75	507	10.9	18.48	1
2015	-0.609555	18	F	26	89	547			1
2015	0.461654	12	F	32	132				1
2009	0.0368858	6	M	39	55		12.1		2
2012	-0.521936	21	M	46	52				1
2013	1.65097	17	M	37	107	374	13	7.27	1
2013	-1.30649	20	M	31	72	703	28.2	11.79	3
2012	0.197976	9	F	38	61	350	23.4		2
2013	1.477	6	F	25	72	375	24.3	5.01	1
2013	1.65097	15	F	39	69	448	32.5	7.65	2
2013	0.955097	10	F	47	76	533	18.5	7.35	3
2015	-1.52773	6	F	23	71	371	21.5	6.38	2
2015	-0.303495	23	F	26	44	410	19.5		3
2015	1.2268	23	M	32	123	478			1
2009	0.74339	10	F	32	12		6.5		2
2011	-0.663807	6	F	39	16				2
2012	0.629923	22	F	40	86	597	25.5		1
2012	0.629923	6	F	47	73				1
2012	-0.377954	9	F	38					2
2012	0.629923	6	F	44	47				3
2015	0.308624	6	F	35	87	497	33.5	10.22	2
2015	1.53286	6	F	21	82				1
2015	1.37983	6	F		129				2
2013	0.17224	9	M	31	91	387			1
2013	-0.00172816	18	M	30	101	391			2
2009	-0.591118	6	F	42	61		4.8		1
2010	-0.691884	6	F	36	134				1
2013	-1.30649	24	F	37	57	508	36.7	11.82	2
2015	0.920744	6	F	29	63	401	21.5		1
2015	-0.762584	20	F	33	72	529	24		2
2012	-0.521936	21	F	48	98				2
2013	0.60716	6	F	38	48	345	15	5.18	1
2013	1.39002	6	F	19	67				1
2015	-0.915614	8	F	46	104				2
2011	-0.663807	6	F	47					2
2012	1.06187	21	F	31	92	399	15		1
2012	-0.521936	21	F	44	83				1
2012	0.629923	6	F	40	63				2
2015	0.920744	6	F	31	81	423			1
2015	-1.68076	6	F	20	72	568	20	11.28	1
2012	-0.377954	9	M	40					1
2013	-1.21951	6	M	22	17	375	14.9	10.13	3
2015	-0.762584	20	F	35	90	492	14		1
2015	-0.762584	20	F	30	62	526			2
2009	-2.86763	6	F	35					1
2010	-0.293814	6	F	30					3
2011	-0.565388	6	F	38	34		5.7		1
2013	-1.13252	22	F	27	41	394	12.3		1
2013	-1.13252	20	F	34	39	450	32.1	12.37	1
2015	-0.915614	20	F	28	74	531	17		2
2015	1.07377	6	F	19					3
2011	-0.663807	6	M	41	59		26.5		2
2015	0.00256475	22	F	47	98	415	28.7	7.84	1
2015	-1.68076	22	F	29	78	732	25.1	10.81	1
2010	-0.161124	9	F	28	117		11		1
2011	0.320387	15	F	40	84		11.3		1
2012	-1.38583	8	F	33	65	457	17		2
2012	-0.377954	9	F	39					2
2013	0.868112	18	M	27	107	357	12	5.94	1
2012	-0.521936	5	F	39	135				1
2012	0.629923	14	F	35	110				1
2009	-2.55363	16	F		6				2
2012	0.773906	6	M	40	96	480			2
2013	1.56398	23	F	25	45	438	25	6.64	1
2015	1.53286	6	F	32	44	405	20		1
2015	0.155595	24	F	37	86	418	25.3	13.73	1
2015	-0.762584	20	F	35	56	526			1
2009	0.82189	22	F	32	25				1
2013	-0.349664	21	F	27	101	404	19.1	4.63	1
2013	-0.436648	9	F	24	71	529	12.7	14.95	1
2015	1.07377	21	F	25	63				1
2013	-1.21951	22	F	30	34	388	18.5		2
2012	0.629923	6	F	39	50	503			2
2013	0.433192	6	F	27	73	305	26		1
2013	-1.04554	24	F	39	56	555	33.2	14.96	2
2015	0.920744	22	F	28	66	519	19.3		2
2013	-1.13252	22	F	25	45	459	22.1	16.73	1
2015	0.767714	6	F	20	68				3
2012	-1.09787	22	M	38	49	543			2
2013	-0.26268	6	F	17	70	358	12.9	8.76	1
2015	0.155595	21	F	48	92	520	45.9	16.46	1
2015	-0.915614	8	F	20	19	563	10.8		1
2013	-1.30649	18	F	30	96	487	13.5	8.08	3
2012	-1.38583	6	F	41					1
2013	1.39002	6	F	38	54	436	20.7	9.19	1
2012	-0.953884	5	F	36	88	406			1
2013	1.65097	17	F	36	105	346	12	11.08	1
2011	-0.368549	6	F	37					1
2015	-0.915614	8	F	28	102	531			1
2012	0.629923	22	M	34	61	385	18.1		1
2012	0.773906	6	M	32	110	458	22.2		3
